# Supplementary material for: Association between Mediterranean Dietary Pattern and Breakfast Quality with Physical Fitness in School Children: The HIIT Project
Source: Nutrients. 2021 Apr 18;13(4):1353. doi: 10.3390/nu13041353 (PMC8072945; doi:10.3390/nu13041353)
Supplement: Supplementary file 1 [file nutrients-13-01353-s001.zip › nutrients-1133447-supplementary.pdf]

**Table S1.** Pearson correlation between physical fitness and physical activity.

|                                           | Cardiorespiratory<br>fitness | Upper-limbs<br>muscular<br>strength | Lower-limbs<br>muscular<br>strength | Speed–agility* |
|-------------------------------------------|------------------------------|-------------------------------------|-------------------------------------|----------------|
| Moderate-to-vigorous<br>physical activity | 0.334**                      | 0.026                               | 0.245**                             | 0.251**        |

Data were adjusted for sex. \*In the speed–agility test, less time indicates a faster runner; a lower score indicates better performance. \*\*p < 0.01
